# Supplementary material for: α- and β-Adducin polymorphisms affect podocyte proteins and proteinuria in rodents and decline of renal function in human IgA nephropathy
Source: PubMed Central journal article supplement — J Mol Med (Berl). 2009 Oct 17;88(2):203–17. doi: 10.1007/s00109-009-0549-x (PMC2832889; doi:10.1007/s00109-009-0549-x), 2009-10-17
Supplement: 109_2009_549_MOESM1_ESM.pdf [file 109_2009_549_MOESM1_ESM.pdf]

# **$\alpha$ - and $\beta$ -Adducin polymorphisms affect podocyte proteins and proteinuria in rodents and renal function decline in human IgA nephropathy**

Mara Ferrandi, Daniele Cusi, Isabella Molinari, Lucia Del Vecchio, Cristina Barlassina, Maria Pia Rastaldi, Francesco Paolo Schena, Fabio Macciardi, Carmelita Marcantoni, Dario Roccatello, Luanne L. Peters, Silvia Armelloni, Li Min, Laura Giardino, Deborah Mattinzoli, Claudio Camisasca, Fiorentina Palazzo, Paolo Manunta, Patrizia Ferrari, Giuseppe Bianchi

Journal of Molecular Medicine 2009

## **Supplementary Material**

### **Supplementary Methods**

**Immunogold electron microscopy.** The analysis was performed on rat renal tissue, fixed in a mixture of formaldehyde, glutaraldehyde, and phosphate buffer, soaked in glucose and frozen, or alternatively embedded in Lowicril K4M resin (Electron Microscopy Sciences, Societa` Italiana Chimici, Rome, Italy), as previously described (Regele HM, Filipovic E, Langer B, Poczewki H, Kraxberger I, Bittner RE, Kerjaschki D: Glomerular expression of dystroglycans is reduced in minimal change nephrosis but not in focal segmental glomerulosclerosis. *J Am Soc Nephrol* 2000, 11:403–412). An indirect immunogold labeling procedure was performed on ultrathin sections. Briefly, after blocking, the material was incubated with the primary antibody, then by the secondary 10-nm gold-conjugated goat anti-mouse secondary antibody (Aurion, DBA, Milan, Italy). Specificity of antibody labelling was demonstrated by the lack of staining after substituting proper control immunoglobulins (Invitrogen) for the primary antibody.

**Figure S1**

**Immunogold analysis in rat kidneys**

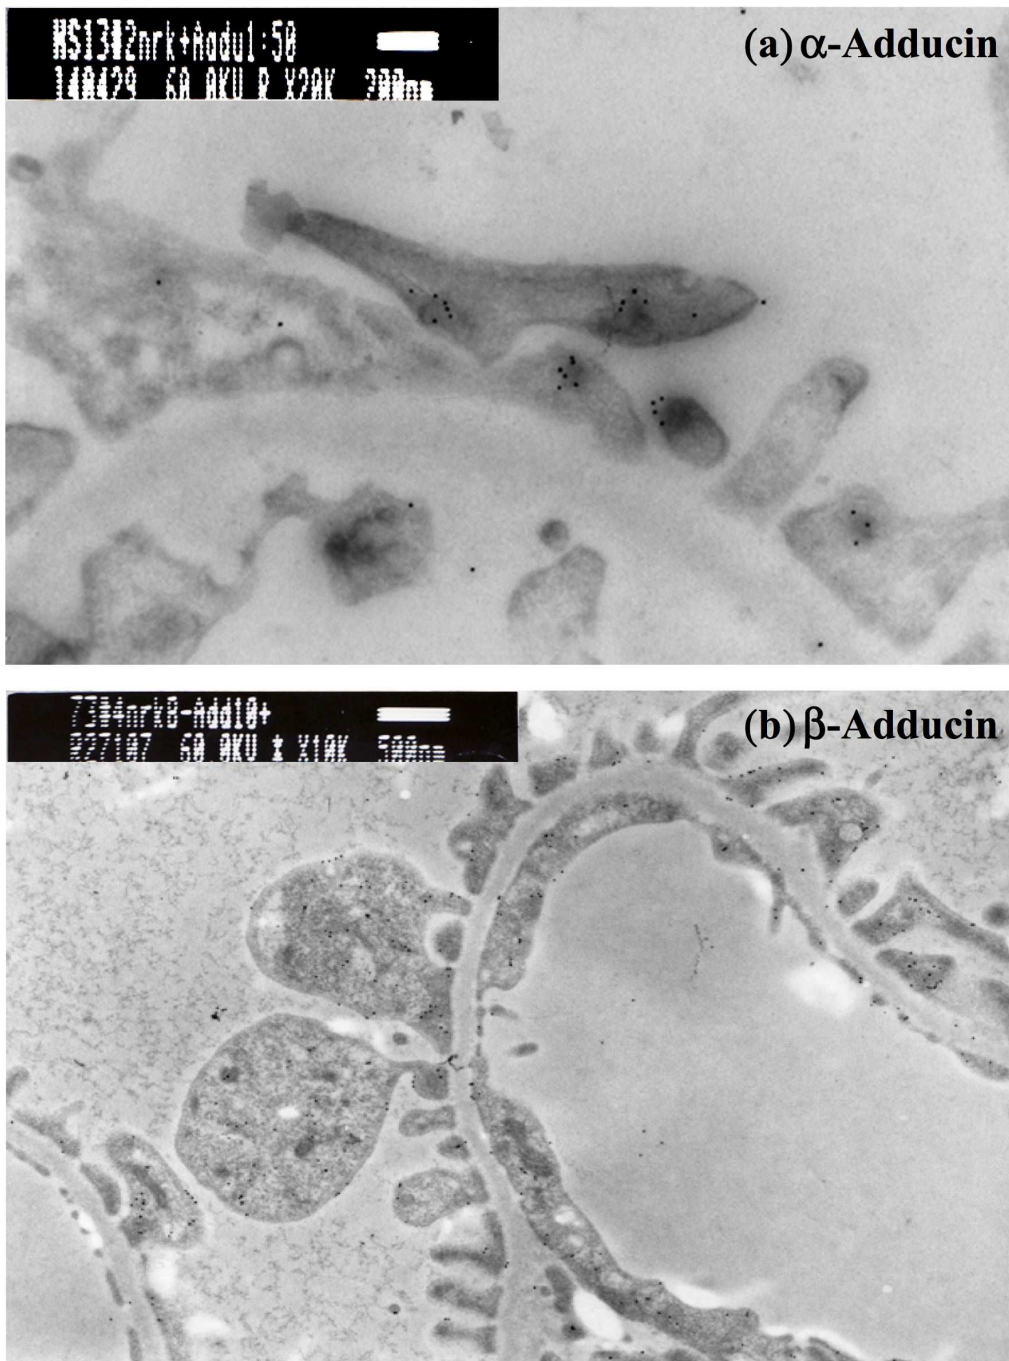

**Figure S1** Immunogold electron microscopy for  $\alpha$ -Adducin and  $\beta$ -Adducin localization in rat glomeruli.

(a)  $\alpha$ -Adducin looks localized around vesicles present in podocyte foot processes; (b)  $\beta$ -Adducin is either dispersed in the cytoplasm and localized along the surface of podocyte foot processes.

Figure S2

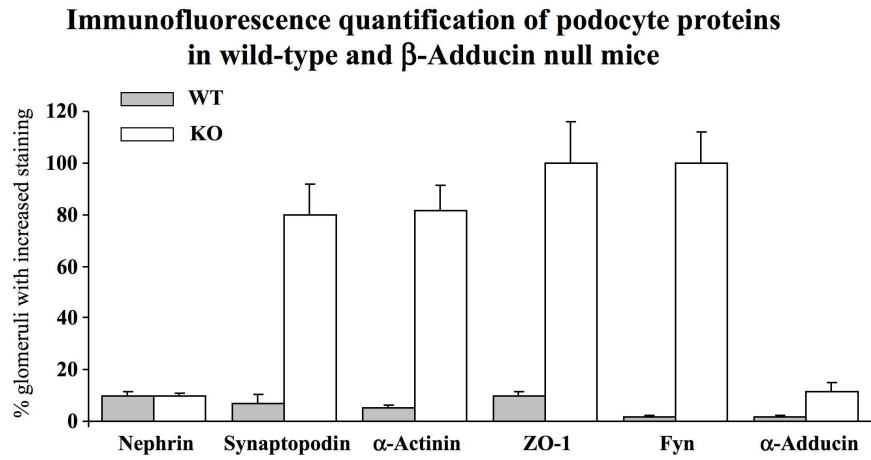

**Figure S2** Immunofluorescence quantification of podocyte proteins and Adducin in mouse kidney sections from  $\beta$ -Adducin knockout mice. The results refer to the immunofluorescence analysis showed in Figure 3 of the manuscript. Five wild-type (WT) and  $\beta$ -Adducin knockout mice (KO) have been analyzed. Forty glomeruli per mouse were evaluated and quantification has been expressed as percentage of glomeruli with increased staining.  $\beta$ -Adducin is absent in KO mice. Data are mean  $\pm$  sem.

**Figure S3**

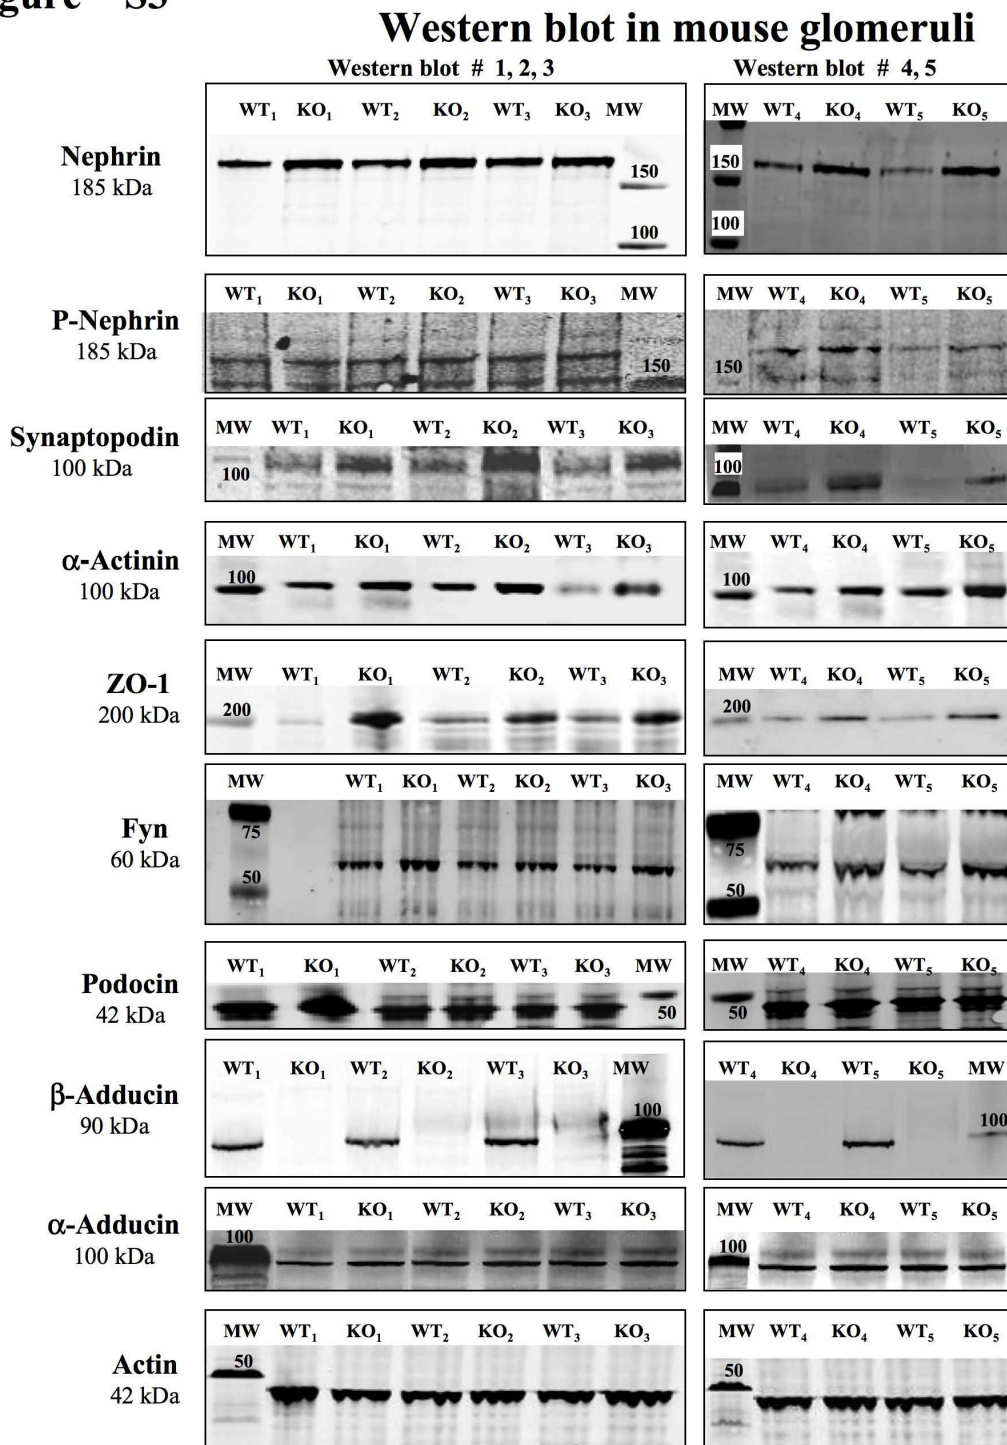

**Figure S3** Western blot analysis of podocyte proteins in isolated glomeruli from  $\beta$ -Adducin knockout mice. The Western blot analysis refers to the data reported in Figure 4 of the manuscript. The figure shows the Western blots (10  $\mu$ g protein/lane) for podocyte protein quantification on the individual preparations of isolated glomeruli from wild-type (WT) and  $\beta$ -Adducin knockout mice (KO) (n=5 preparations for each group). Standard molecular weights (MW) are indicated.

**Figure S4**

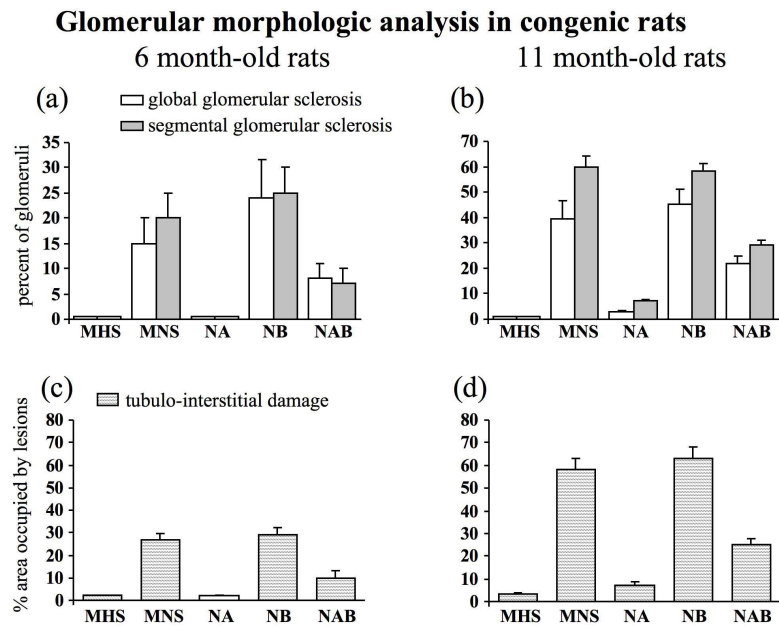

**Figure S4** Glomerular morphologic analysis in kidneys from congenic rat substrains. The analysis refers to the images reported in Figure 6 of the manuscript. The analysis has been performed in MHS, MNS and congenic substrains for  $\alpha$ -Adducin (NA),  $\beta$ -Adducin (NB) and  $\alpha\beta$ -Adducin (NAB) (n=5 per group) at 6 and 11 months of age. Forty glomeruli per sample have been analyzed for each rat. The figure shows the percentage of glomeruli affected by global and segmental sclerosis in rats at 6 (a) and 11 months (b) and the percentage of area occupied by tubulo-interstitial damage in rats at 6 (c) and 11 months (d). Data are mean  $\pm$  sem.

**Figure S5**

**Electron microscopy of rat kidneys at 3 months of age**

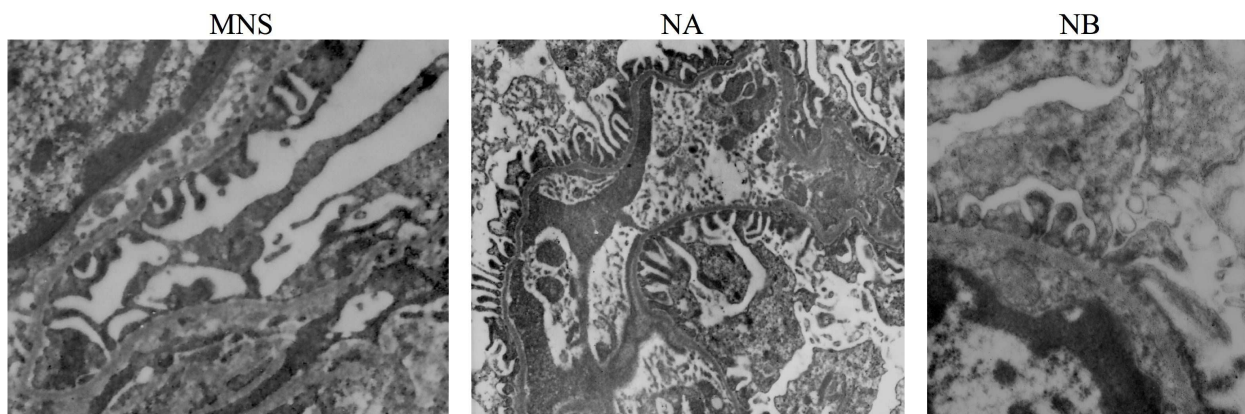

**Figure S5** Electron microscopy in rat kidneys from congenic rat substrains. The analysis has been performed in kidneys of MNS, NA and NB rats at 3 months of age (n=5 per group). MNS and NB glomeruli display podocyte foot process effacement, while NA appears protected. Magnification: 8000X (MNS, NB), 6000X (NA).



**Figure S6**

**Immunofluorescence quantification of podocyte proteins in congenic rats**

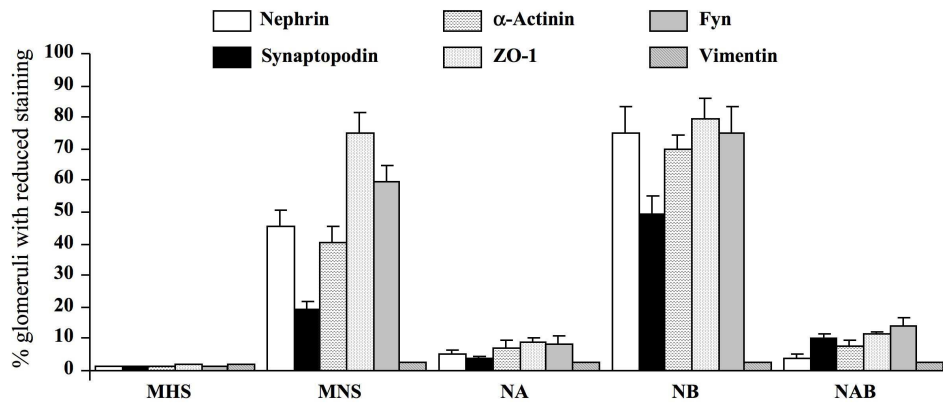

**Figure S6** Quantitative evaluation of immunofluorescence analysis for podocyte proteins in congenic rats. The results refer to the immunofluorescence analysis showed in Figure 7-8 of the manuscript. The analysis has been performed in MHS, MNS and congenic substrains for  $\alpha$ -Adducin (NA),  $\beta$ -Adducin (NB) and  $\alpha\beta$ -Adducin (NAB) (n=5 per group) at 1.5 months of age. Forty glomeruli per animal have been analyzed. The quantification has been expressed as percentage of glomeruli with reduced staining of podocyte proteins. Data are mean  $\pm$  sem.

**Figure S7**

**Immunofluorescence quantification of  $\alpha$ - and  $\beta$ -Adducin in glomeruli of congenic rats**

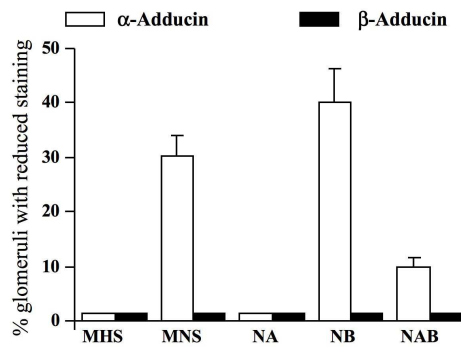

**Figure S7** Quantitative evaluation of immunofluorescence analysis for Adducin in glomeruli from congenic rat substrains. The results refer to the immunofluorescence analysis showed in Figure 9 of the manuscript. The analysis has been performed in MHS, MNS and congenic substrains for  $\alpha$ -Adducin (NA),  $\beta$ -Adducin (NB) and  $\alpha\beta$ -Adducin (NAB) (n=5 per group) at 1.5 months of age. Forty glomeruli have been analyzed for each rat. The quantification has been expressed as percentage of glomeruli with reduced staining of  $\alpha$ - and  $\beta$ -Adducin. Data are mean  $\pm$  sem.

**Figure S8**

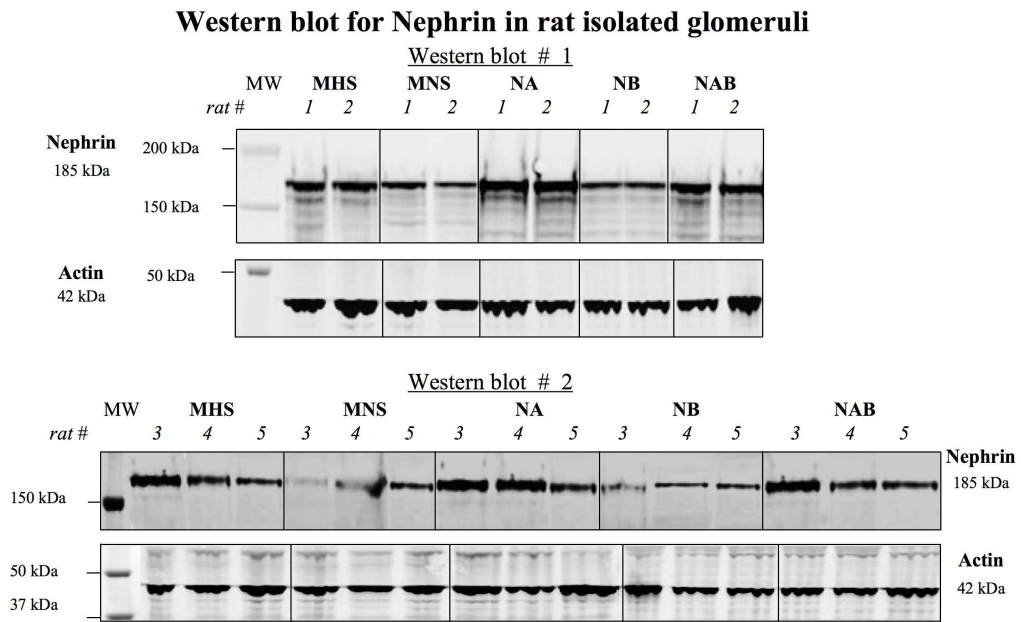

**Figure S8** Western blot analysis of Nephrin and Actin in isolated glomeruli from congenic rat substrains. The Western blot analysis refers to the data reported in Figure 10 of the manuscript. The figure shows the Western blots of the individual glomerular preparations from MHS, MNS and congenic substrains for  $\alpha$ -Adducin (NA),  $\beta$ -Adducin (NB) and  $\alpha\beta$ -Adducin (NAB) (n=5 per group), probed with Nephrin and Actin antibodies. No difference in actin was detected among all groups. Standard molecular weights (MW) are indicated.

**Figure S9**

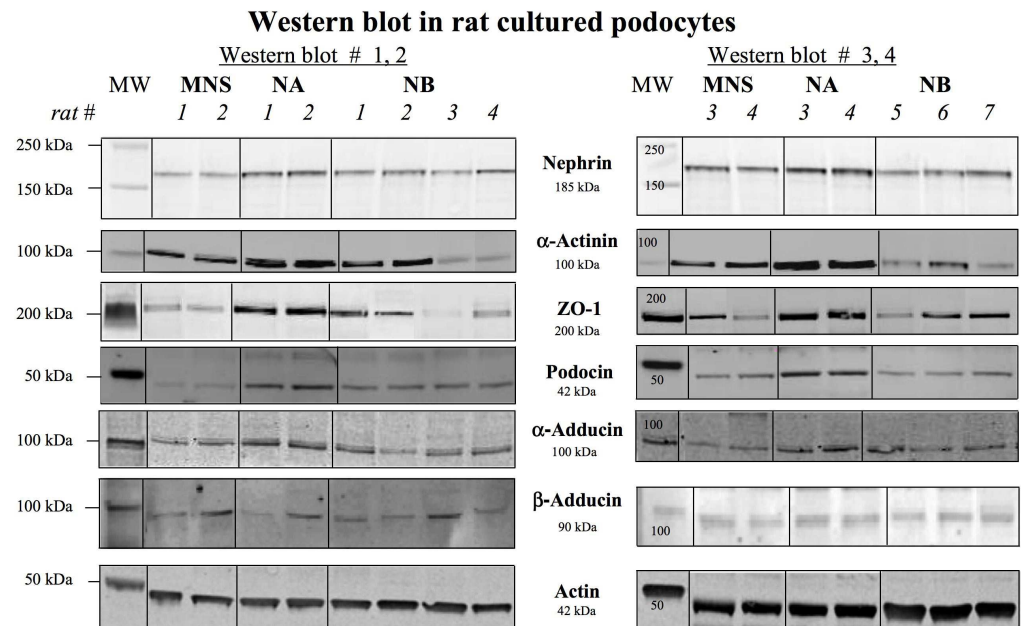

**Figure S9** Western blot analysis of podocyte proteins in primary cultures of glomerular podocytes from congenic rat substrains. The Western blot analysis refers to the data reported in Figure 11 of the manuscript. The figure shows the Western blots of the individual podocyte preparations obtained from MNS (n=4) and congenic substrains for  $\alpha$ -Adducin (NA) (n=4) and  $\beta$ -Adducin (NB) (n=7) probed with antibodies against podocyte proteins. Standard molecular weights (MW) are indicated.

**Figure S10**

**IgA nephropathy patients**

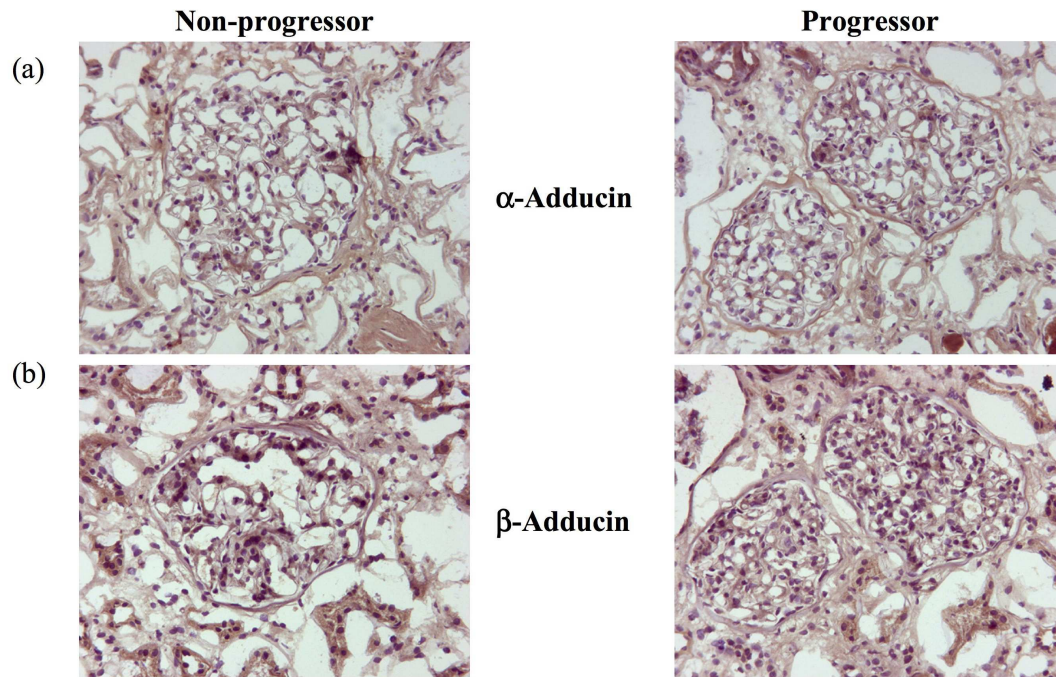

**Figure S10** IgA nephropathy patients. Twenty IgAN patients have been analyzed and divided into two groups according to the rate of renal function decline: stable renal function (non-progressors) or rapidly progressing towards ESRF (progressors). Renal images were obtained from renal biopsies of two representative patients belonging to the non-progressor and progressor group. No difference in  $\alpha$ -Adducin (a) and  $\beta$ -Adducin (b) glomerular expressions was detected between the two groups. Magnification: 250X
